# Supplementary material
Source: Research Square preprint supplement (doi:10.21203/rs.3.rs-9813032/v1)
Supplement: Supplementary file 1 [file 39a3de8478d032bf1eda667a.docx]

**Table 1.**

Kinetic parameters of first-order, second-order, Ritger–Peppas, Peppas–Sahlin, and Weibull models for the temperature-dependent swelling of the Xanthan/PAAm hydrogel in different medium.

| **Medim/Temperature** | **Equlibirium swelling degree** | **Ritger-Peppas**  **model** | | | | **Weibull**  **modeli** | | | | **Peppas-Sahlin modeli** | | **II Order kinetic model** | | **I Order kinetic model** | |
| --- | --- | --- | --- | --- | --- | --- | --- | --- | --- | --- | --- | --- | --- | --- | --- |
| **Parameters** | **gr/gr** | **n** | **K**  **min-1** | **R²** | **Mechanism** | **α**  **min** | **β** | **R²** | **Mechanism** | **k₁**  **min-m** | **k₂**  **min-2m** | **K,**  **gr/gr-1min-1** | **R²** | **k**  **min-1** | **R²** |
| DW, T=293 K | 39.34 | 0.8391 | 0.0045 | 0.9877 | Fickian | 423 | 0.9598 | 0.9954 | Diffusion-dominant | 0.0083 | 0.0033 | 8.16x10¯⁵ | 0.9953 | 2.63x10¯³ | 0.9996 |
| DW, T=303 K | 186.44 | 0.9866 | 0.0027 | 0.9921 | Fickian | 323 | 1.013 | 0.9997 | Strong diffusion | 0.0129 | 0.011 | 3 x10¯⁴ | 0.9944 | 2.72x10¯³ | 0.9908 |
| DW, T=313 K | 135.5 | 0.8689 | 0.0042 | 0.9334 | Fickian | 399 | 0.9369 | 0.9973 | Anomalous | 0.0129 | 0.011 | 2.35x10¯⁵ | 0.9301 | 1.29x10¯² | 0.9647 |
| DW, T=323 K | 171.5 | 0.9315 | 0.0039 | 0.9992 | Fickian | 213 | 1.2187 | 0.9652 | Sigmoidal, relaxation | 0.0041 | 0.006 | 2.07x10¯⁵ | 0.9985 | 8.35x10¯³ | 0.8115 |
| DW, T=333 K | 199.98 | 1.0467 | 0.0027 | 0.9971 | Super Case II | 186 | 1.2646 | 0.9964 | Relaxation dominant | 0.0059 | 0.010 | 2x10¯⁵ | 0.8991 | 7.75x10¯³ | 0.9909 |
| DW, T=343 K | 241.7 | 1.0341 | 0.004 | 0.99 | Super Case II | 154 | 1.1429 | 0.99 | Relaxation dominant | 0.0146 | 0.0109 | 2.4x10¯⁵ | 0.9054 | 7.33x10¯³ | 0.9937 |
| 0.9% NaCl, T=290 K | 23.58 | 0.5809 | 0.0244 | 0.9702 | Fickian | 351 | 0.6325 | 0.9925 | Diffusion | 0.0221 | 0.0025 | 2.38x10¯⁵ | 0.9996 | 2.53x10¯³ | 0.99953 |
| 0.9% NaCl, T=303 K | 43.19 | 0.6325 | 0.015 | 0.9753 | Fickian | 432 | 0.7372 | 0.9922 | Diffusion | 0.0325 | 0.0011 | 1.05x10¯⁴ | 0.9814 | 4.2x10¯⁴ | 0.9497 |
| 0.9% NaCl, T=313 K | 24.31 | 0.5999 | 0.0312 | 0.9992 | Fickian | 145 | 0.836 | 0.9822 | Diffusion | 0.0440 | 0.0026 | 4.21x10¯⁴ | 0.9939 | 3.67x10¯³ | 0.9923 |
| 0.9% NaCl, T=323 K | 26.54 | 0.6203 | 0.0224 | 0.9984 | Fickian | 242 | 0.756 | 0.9993 | Diffusion | 0.0287 | 0.0034 | 2.49x10¯⁴ | 0.9944 | 3.15x10¯³ | 0.991 |
| 0.9% NaCl, T=333 K | 28.42 | 0.6078 | 0.0279 | 0.9977 | Fickian | 171 | 0.8029 | 0.9926 | Diffusion | 0.0359 | 0.0036 | 2.92x10¯⁴ | 0.9919 | 5x10¯³ | 0.9867 |
| 0.9% NaCl, T=343 K | 43.93 | 0.5853 | 0.025 | 0.9953 | Fickian | 271 | 0.716 | 0.9997 | Diffusion | 0.0376 | 0.0019 | 1.59x10¯⁴ | 0.9894 | 2.96x10¯³ | 0.9916 |
| CaCl₂ 0.15 M, T=293 K | 9.82 | 0.5315 | 0.0289 | 0.9903 | Fickian | 339 | 0.7013 | 0.9873 | Diffusion, ionic hardening | 0.0425 | 0.0006 | 4.78x10¯⁴ | 0.9982 | 1.99x10¯³ | 0.9804 |
| AlCl₃ 0.15 M, T=293 K | 1.65 | 0.5025 | 0.0908 | --- | Full Fickian | 38 | 0.7984 | 0.9106 | Diffusion, complexation | --- | --- | 4.86x10¯² | 0.9968 | 0 | 0 |
| pH=3 T=293 K | 5.92 | 0.6512 | 0.0315 | 0.9992 | Weak anomalous | 135 | 0.5966 | 0.9647 | Diffusion | 0.0203 | 0.0112 | 3.01x10¯³ | 0.9988 | 1.83x10¯³ | 0.9011 |
| pH=7 T=293 K | 7.58 | 0.5899 | 0.0293 | 1 | Fickian | 212 | 0.7173 | 0.9934 | Weak anomalous | 0.034 | 0.0042 | 1.12x10¯³ | 0.9998 | 1.84x10¯³ | 0.9702 |
| pH=10 T=293 K | 20.18 | 0.6629 | 0.0139 | 0.9994 | Anomalous | 405 | 0.7493 | 0.9961 | Weak anomalous | 0.009 | 0.005 | 1.72x10¯⁴ | 0.9985 | 1.57x10¯³ | 0.9899 |

**Table 2.**

Diffusion coefficients, equilibrium constants, and Gibbs free energy values of the swelling process of xanthan-PAAm hydrogel as a function of temperature in different medium.

| **Medium,**  **Temperature ⁰C/K** | | Swelling equilibrium constant, K | Diffusion coefficient, D, m²/sec. | Thickness of swelling gel, meter | ΔG°, kJ/mol |
| --- | --- | --- | --- | --- | --- |
| Deionized water | 20 ⁰C / 293 K | 2392 | 9.56x10¯¹⁰ | 0.014 | -18.9 |
| 30 ⁰C / 303 K | 3380 | 1.2x10¯⁹ | 0.013 | -20.5 |
| 40 ⁰C / 313 K | 4672 | 2.08x10¯⁹ | 0.011 | -22.0 |
| 50 ⁰C / 323 K | 6329 | 1.68x10¯⁹ | 0.015 | -23.5 |
| 60 ⁰C / 333 K | 8418 | 6.05x10¯⁹ | 0.019 | -25.0 |
| 70 ⁰C / 343 K | 315412 | 1.3x10¯⁹ | 0.009 | -36.1 |
| 0.9 % (w/w) NaCl | 20 ⁰C / 293 K | 27 | 3.09x10¯¹⁰ | 0.008 | -8.04 |
| 30 ⁰C / 303 K | 28 | 2.73x10¯¹⁰ | 0.009 | -8.45 |
| 40 ⁰C / 313 K | 30 | 1.79x10-9 | 0.015 | -8.87 |
| 50 ⁰C / 323 K | 32 | 4.36x10¯10 | 0.008 | -9.28 |
| 60 ⁰C / 333 K | 33 | 6.82x10¯10 | 0.009 | -9.69 |
| 70 ⁰C / 343 K | 34.6 | 5.6x10¯10 | 0.01 | -10.11 |
| CaCl₂ 0.15 mol/L | | --- | 2.75x10¯12 | 0.003 | --- |
| pH=10 | | --- | 1.78x10¯10 | 0.006 | --- |
