# Supplementary material
Source: Research Square preprint supplement (doi:10.21203/rs.3.rs-9813032/v1)
Supplement: Supplementary file 2 [file bdcc43147a46bc78f860e705.xlsx]

## Sheet: H2O T=20-70
suda	20C	30C	40C	50C	60C	70C
K1	0.00827	-0.012953	-0.012953	-0.00402	-0.005965	-0.014654
K2	0.003332	0.011117	0.011117	0.006067	0.010277	0.010947

## Sheet: NaCl T=20-70
NaCl	20C	30C	40C	50C	60C	70C
K1	0.022144	0.03256	0.044027	0.028725	0.035983	0.037696
K2	0.002598	0.001076	0.002582	0.003447	0.003667	0.001905

## Sheet: pH3,7,10, CaCl2 
NaCl	CaCl2	pH=3	pH=7	pH=10
K1	0.042558	0.020335	0.034003	0.009018
K2	0.00063	0.01121	0.004223	0.005074
